# Supplementary material for: Differential gene expression profile in pig adipose tissue treated with/without clenbuterol
Source: PubMed Central journal article supplement (PMC2231380; doi:10.1186/1471-2164-8-433), 2007-11-26
Supplement: 1471-2164-8-433-S1.pdf [file 1471-2164-8-433-S1.pdf]

## Additional file 1

**Table.1 Clenbuterol residue in porcine blood and adipose**

| Pig             | 3 month-old group |       |       |       | 4 month-old group |       |       |        |
|-----------------|-------------------|-------|-------|-------|-------------------|-------|-------|--------|
|                 | Hog 1             | Hog 2 | Sow 1 | Sow 2 | Hog 3             | Hog 4 | Sow 3 | Sow 4  |
| Blood (ng/ml)   | 0.00              | 10.00 | 0.00  | 26.44 | 0.00              | 60.57 | 0.00  | 176.08 |
| Adipose (ng/ml) | 0.00              | 0.00  | 0.00  | 1.62  | 0.00              | 5.32  | —     | —      |

—: not determined

**Table 2. Body weight of pigs treated with/without clenbuterol**

| Pig                                     | 3 month-old group |       |       |       | 4 month-old group        |                          |                        |                          |
|-----------------------------------------|-------------------|-------|-------|-------|--------------------------|--------------------------|------------------------|--------------------------|
|                                         | Hog 1             | Hog 2 | Sow 1 | Sow 2 | Hog 3                    | Hog 4                    | Sow 3                  | Sow 4                    |
| Clenbuterol<br>(mg/kg BW <sup>a</sup> ) | 0                 | 25    | 0     | 25    | 0                        | 25+50 <sup>b</sup>       | 0                      | 25+50 <sup>b</sup>       |
| 2-month BW<br>(kg)                      | 18.6              | 17.4  | 17.5  | 16.2  | 16.8                     | 17.2                     | 17.5                   | 18.3                     |
| 3-month BW<br>(kg)                      | 33.2              | 32.6  | 30.6  | 29.8  | 30.5                     | 32                       | 31                     | 32.2                     |
| 4-month BW<br>(kg)                      | —                 | —     | —     | —     | 45.6                     | 46.6                     | 46                     | 46.4                     |
| Increased BW<br>(kg)                    | 14.6              | 15.2  | 13.1  | 13.6  | 28.8                     | 29.4                     | 28.5                   | 28.1                     |
|                                         |                   |       |       |       | (13.7&15.1) <sup>c</sup> | (14.8&14.6) <sup>c</sup> | (13.5&15) <sup>c</sup> | (13.9&14.2) <sup>c</sup> |

**a. BW : Body weight**

**b. 25 mg/kg body weight for the 3<sup>rd</sup> month and 50 mg/kg body weight for the 4<sup>th</sup> month**

**c. Increased body weight in the 3<sup>rd</sup> month and increased body weight in the 4<sup>th</sup> month**

**Table 3. Cross-sectional area of muscle fibers of pigs with/without the administration of clenbuterol**

|                                      | No. 1   | No. 2   | No. 3   | No. 4   | No. 5   | No. 6   | No. 7   | No. 8   |
|--------------------------------------|---------|---------|---------|---------|---------|---------|---------|---------|
| Test pigs<br>( $\mu\text{ m}^2$ )    | 1976.12 | 1915.08 | 1818.08 | 1593.78 | 1639.06 | 1898.21 | 1793.26 | 1910.14 |
| Control pigs<br>( $\mu\text{ m}^2$ ) | 1836.02 | 1917.22 | 1397.47 | 1469.39 | 1499.36 | 1654.30 | 1543.33 | 1764.34 |

These two groups are significantly different (student t-test p value 0.0244).

**Table 4. Number of adipose cells on histological section slides visible through the microscope eyepiece**

| Eyepiece                | No.1 | No.2 | No.3 | No.4 | No.5 |
|-------------------------|------|------|------|------|------|
| Number for control pigs | 8    | 10   | 7    | 10   | 8    |
| Number for test pigs    | 16   | 24   | 23   | 37   | 28   |

Amplified 10×40

The cells on upper and left edges were counted only if the cell crossed the edge of the eyepiece.

The two groups are significantly different (student t-test p value 0.0058).
